# Supplementary material for: Synthesis, Characterization, and Antimicrobial Evaluation of Random Poly(ester-Carbonate)s Bearing Pendant Primary Amine in the Main Chain
Source: PubMed Central journal article supplement (PMC7696737; doi:10.3390/polym12112640), 2020-11-10
Supplement: polymers-12-02640-s001.pdf [file polymers-12-02640-s001.pdf]

# Synthesis, Characterization, and Antimicrobial Evaluation of Random Poly(ester-Carbonate)s Bearing Pendant Primary Amine in the Main Chain

Peng Dong, Jing Feng, Sujuan Li, Tingli Sun, Qingshan Shi \* and Xiaobao Xie \*

Guangdong Provincial Key Laboratory of Microbial Culture Collection and Application, State Key Laboratory of Applied Microbiology Southern China, Guangdong Institute of Microbiology, Guangdong Academy of Sciences

\*Correspondence: jigan@gdim.cn (Q.S.); Tel.: +86-2087137652(Q.S.); xiexb@gdim.cn (X.X.); Tel.: +86-2037656986 (X.X.)

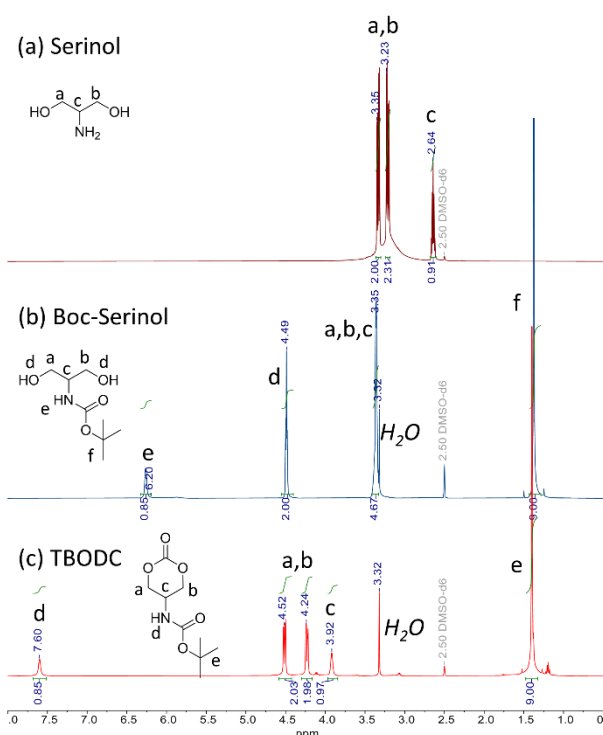

Figure S1.  $^1\text{H}$  NMR spectra of serinol (a), Boc-serinol (b) and TBODC(c)( $\text{DMSO-}d_6$ , 400 MHz).

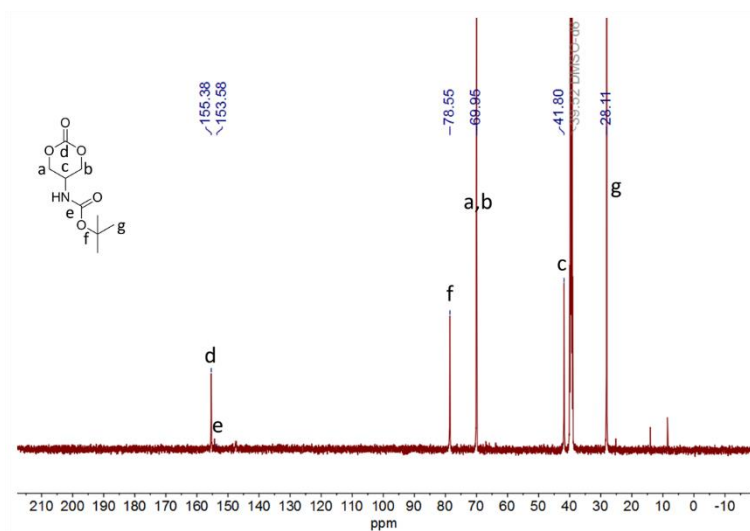

Figure S2.  $^{13}\text{C}$  NMR spectrum of TBODC ( $\text{DMSO-}d_6$ , 100 MHz)

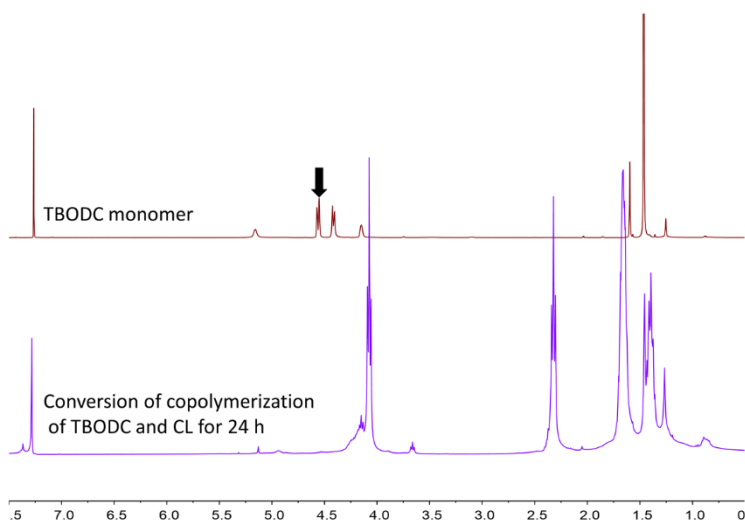

Figure S3. Investigation of copolymerization time of TBODC and CL.

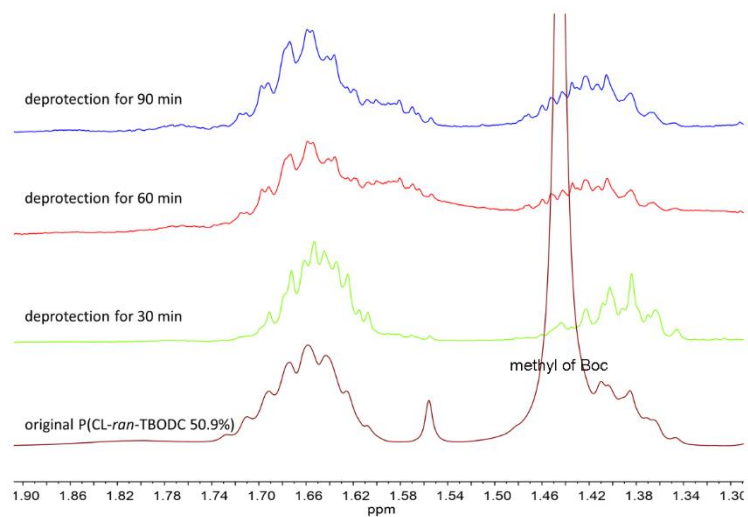

Figure S4.  $^1\text{H}$  NMR spectra of P(CL-ran-TBODC 50.9%) after deprotection for certain time
